# Supplementary material for: Comparative effectiveness of paediatric kidney stone surgery (the PKIDS trial): study protocol for a patient-centred pragmatic clinical trial
Source: PubMed Central journal article supplement — BMJ Open. 2022 Apr 4;12(4):e056789. doi: 10.1136/bmjopen-2021-056789 (PMC8983998; doi:10.1136/bmjopen-2021-056789), 2022-04-04
Supplement: bmjopen-2021-056789supp001.pdf [file bmjopen-2021-056789supp001.pdf]

**SUPPLEMENTAL FIGURE 1:**

CLINICAL HISTORY: [ ]

EXAMINATION: [ ]

DATE: [ ]

COMPARISON: [ ]

TECHNIQUE: Grayscale sonographic image acquisition was performed of the kidneys and bladder.

FINDINGS:

BLADDER:

Stone visualized at UVJ: [No/Yes]

RIGHT KIDNEY:

Collecting system: [The calyces and pelvis are nondilated.]

Ureter: [The ureter is nondilated.]

Calculi: [No/Yes]

- If calculus present, measure the longest dimension of 3 largest stones

1. Location: [If present, PLEASE DESCRIBE for each measured stone: e.g., upper pole calyx; interpolar calyx; lower pole calyx; renal pelvis; ureteropelvic junction; proximal ureter; distal ureter]

- Size: [ ] mm

- Shadow: [No/Yes]

- Doppler: [Not applicable/Twinkle/No twinkle]

2. Location: [If present, PLEASE DESCRIBE for each measured stone: e.g., upper pole calyx; interpolar calyx; lower pole calyx; renal pelvis; ureteropelvic junction; proximal ureter; distal ureter]

- Size: [ ] mm

- Shadow: [No/Yes]

- Doppler: [Not applicable/Twinkle/No twinkle]

3. Location: [If present, PLEASE DESCRIBE for each measured stone: e.g., upper pole calyx; interpolar calyx; lower pole calyx; renal pelvis; ureteropelvic junction; proximal ureter; distal ureter]

- Size: [ ] mm

- Shadow: [No/Yes]

- Doppler: [Not applicable/Twinkle/No twinkle]

LEFT KIDNEY:

Collecting system: [The calyces and pelvis are nondilated.]

Ureter: [The ureter is nondilated.]

Calculi: [No/Yes]

- If calculus present, measure the longest dimension of 3 largest stones

1. Location: [If present, PLEASE DESCRIBE for each measured stone: e.g., upper pole calyx; interpolar calyx; lower pole calyx; renal pelvis; ureteropelvic junction; proximal ureter; distal ureter]

- Size: [ ] mm

- Shadow: [No/Yes]

- Doppler: [Not applicable/Twinkle/No twinkle]

2. Location: [If present, PLEASE DESCRIBE for each measured stone: e.g., upper pole calyx; interpolar calyx; lower pole calyx; renal pelvis; ureteropelvic junction; proximal ureter; distal ureter]

- Size: [ ] mm

- Shadow: [No/Yes]

- Doppler: [Not applicable/Twinkle/No twinkle]

3. Location: [If present, PLEASE DESCRIBE for each measured stone: e.g., upper pole calyx; interpolar calyx; lower pole calyx; renal pelvis; ureteropelvic junction; proximal ureter; distal ureter]

- Size: [ ] mm

- Shadow: [No/Yes]

- Doppler: [Not applicable/Twinkle/No twinkle]

IMPRESSION:

[Normal ultrasound of the kidneys.]
