# Supplementary material for: Comparative effectiveness of paediatric kidney stone surgery (the PKIDS trial): study protocol for a patient-centred pragmatic clinical trial
Source: PubMed Central journal article supplement — BMJ Open. 2022 Apr 4;12(4):e056789. doi: 10.1136/bmjopen-2021-056789 (PMC8983998; doi:10.1136/bmjopen-2021-056789), 2022-04-04
Supplement: bmjopen-2021-056789supp003.pdf [file bmjopen-2021-056789supp003.pdf]

**IRB Name**

Children's National Health System Institutional Review Board

Children's Hospital of Wisconsin Human Subjects Research Protection Program (HRPP)/Institutional Review Board

Lurie Children's Institutional Review Board

Boston Children's Hospital Institutional Review Board

Cincinnati Children's Hospital Medical Center Institutional Review Board

University of Pennsylvania Institutional Review Board

Nemours Institutional Review Board 1 (formerly Delaware)

Colorado Multiple Institutional Review Board (COMIRB)

Washington University Institutional Review Board

Nemours Institutional Review Board 2 (formerly Florida)

University of Florida Institutional Review Board 1 (Gainesville HSC)

Nationwide Children's Hospital Institutional Review Board

Seattle Children's Hospital Institutional Review Board

Emory University Institutional Review Board

Baylor College of Medicine Institutional Review Board

The University of Alabama at Birmingham Institutional Review Board

Nemours Institutional Review Board 2 (formerly Florida)

University of Texas Southwestern Institutional Review Board

Children's Hospital of Richmond Protocol Review Oversight Committee (PROC)

University of California Los Angeles Medical Institutional Review Board

AdventHealth Orlando Institutional Review Board

Vanderbilt University Medical Center Institutional Review Board

University of Oklahoma Health Sciences Center Institutional Review Board

Indiana University Human Subjects Research Protection Program (HRPP)
